# Supplementary material
Source: PubMed Central journal article supplement (PMC3147231)
Supplement: NIHMS306800-supplement-supplement_1.pdf [file NIHMS306800-supplement-supplement_1.pdf]

**SUPPLEMENTARY APPENDIX (AVAILABLE ONLINE)**

**TABLE.** Predictive accuracy of cervical length for spontaneous preterm birth reported in studies not included in metaanalyses

| Study, year                                 | Cervical length cut-off (mm) | No. of women | Outcome                           | Sensitivity (%) (95% CI) | Specificity (%) (95% CI) | Positive likelihood ratio (95% CI) | Negative likelihood ratio (95% CI) |
|---------------------------------------------|------------------------------|--------------|-----------------------------------|--------------------------|--------------------------|------------------------------------|------------------------------------|
| <b>Asymptomatic women</b>                   |                              |              |                                   |                          |                          |                                    |                                    |
| <i>Testing at 20-24 weeks' gestation</i>    |                              |              |                                   |                          |                          |                                    |                                    |
| Fait, <sup>28</sup> 2005                    | 35                           | 18           | Preterm birth <33 weeks           | 50 (9-91)                | 94 (72-99)               | 8.0 (0.8-83.9)                     | 0.53 (0.13-2.15)                   |
| Aboulghar, <sup>32</sup> 2009               | 38                           | 193          | Preterm birth <34 weeks           | 68 (55-78)               | 50 (42-58)               | 1.4 (1.1-1.7)                      | 0.64 (0.43-0.97)                   |
| <i>Testing after 24 weeks' gestation</i>    |                              |              |                                   |                          |                          |                                    |                                    |
| Imseis, <sup>19</sup> 1997                  | 35                           | 85           | Preterm birth <34 weeks           | 94 (73-99)               | 49 (37-60)               | 1.8 (1.4-2.4)                      | 0.12 (0.02-0.82)                   |
| Wennerholm, <sup>20</sup> 1997              | 33                           | 101          | Preterm birth <35 weeks           | 68 (47-84)               | 54 (44-65)               | 1.5 (1.0-2.2)                      | 0.59 (0.31-1.11)                   |
|                                             |                              |              | Preterm birth <37 weeks           | 69 (53-82)               | 60 (48-71)               | 1.7 (1.2-2.5)                      | 0.51 (0.30-0.87)                   |
| Grisaru-Granovsky, <sup>21</sup> 1998       | 30                           | 38           | Preterm birth <34 weeks           | 100 (65-100)             | 58 (41-74)               | 2.4 (1.6-3.6)                      | 0.00 (0.00-0.93)                   |
| <b>Women with symptoms of preterm labor</b> |                              |              |                                   |                          |                          |                                    |                                    |
| Fuchs, <sup>37</sup> 2004                   | 25                           | 87           | Delivery within 7 days of testing | 100 (83-100)             | 31 (21-43)               | 1.4 (1.2-1.7)                      | 0.00 (0.00-1.27)                   |
